# Supplementary material for: Ecological networks to unravel the routes to horizontal transposon transfers
Source: PubMed Central journal article supplement (PMC5331948; doi:10.1371/journal.pbio.2001536), 2017-02-15

**A****Random sparse**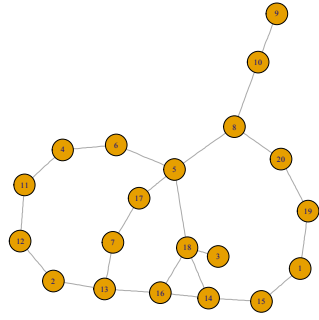**Scale-free**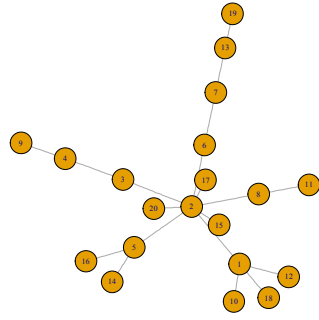**Bipartite**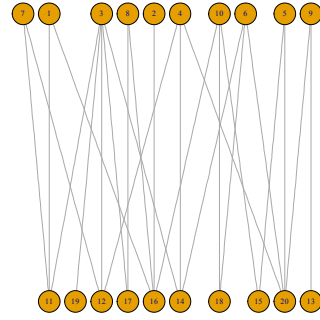**Modular**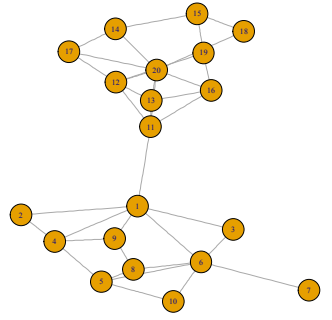**B**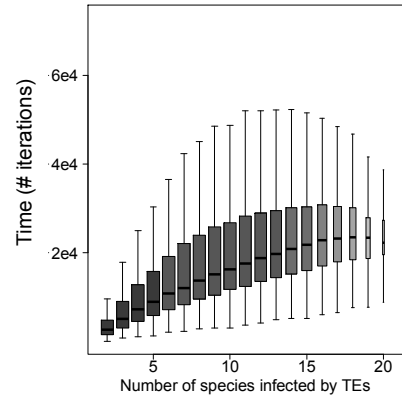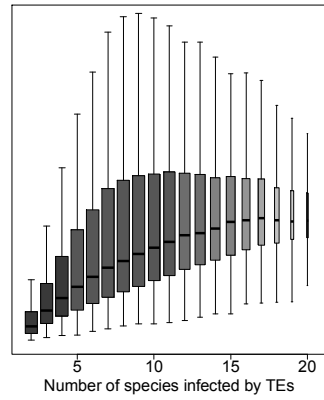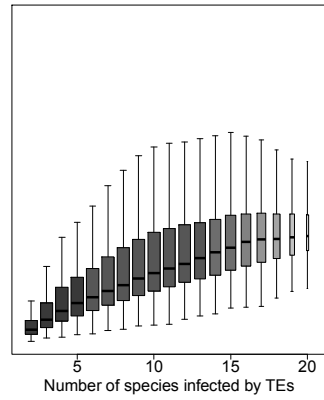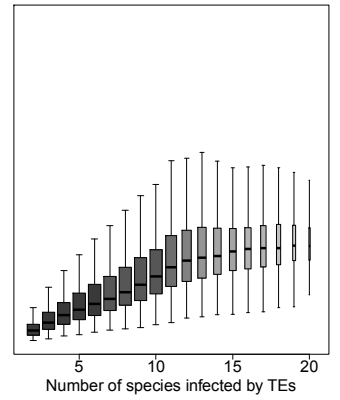**C****Random sparse**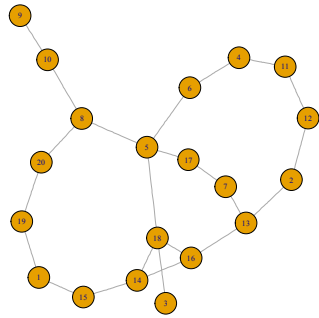**Random mid-dense**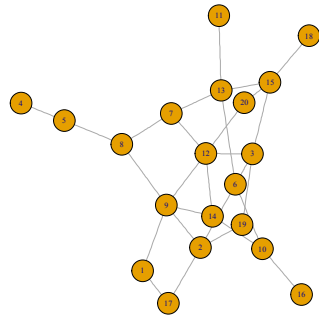**Random dense**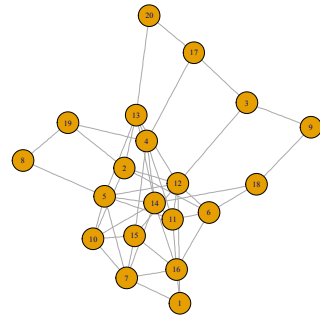**Complete**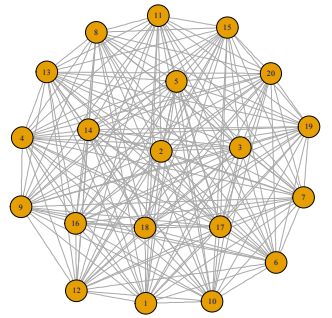**D**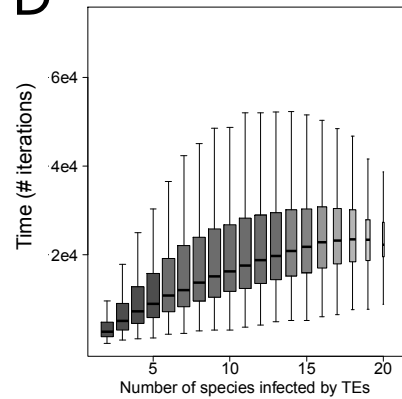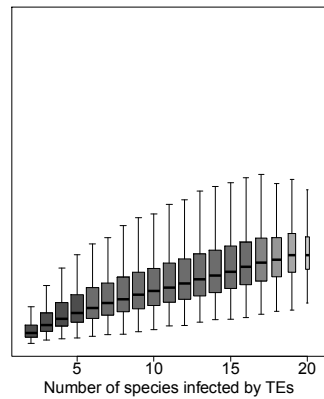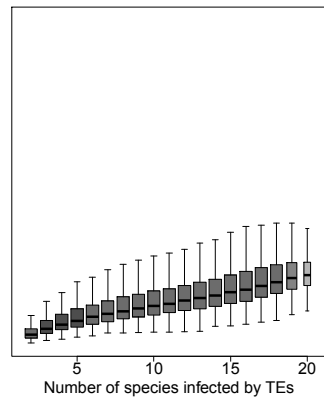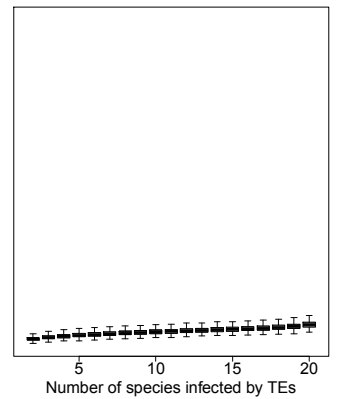

Supplement: pbio.2001536.s003.pdf [file pbio.2001536.s003.pdf]
